# Supplementary material
Source: publisher site journal article supplement (https://www.dovepress.com/article/392778)
Supplement: Supplementary file 1 [file get_supplementary_file.php]

**Supplementary table 1.** Baseline characteristics of patients with or without MINS after PS analysis (including PSM and IPTW).

| **Variable** | **After PSM** | |  | **After IPTW** | | | | **SMD** |
| --- | --- | --- | --- | --- | --- | --- | --- | --- |
|  | **RDW**≤**12.8% (n=4010)** | **RDW>12.8% (n=4010)** | **SMD** | | **RDW**≤**12.8% (n=4034)** | | **RDW>12.8% (n=3969)** |
| Age, years (mean，SD) | 70.3(4.7) | 70.4(4.8) | 0.005 | | 70.6(4.8) | 70.9 (4.9) | | 0.008 |
| Male, n (%) | 2106 (52.5) | 2089 (52.1) | 0.009 | | 2132.8 (52.9) | 2096.9 (52.8) | | 0.01 |
| BMI, kg/m2,(median，IQR) | 24.4 (22.4, 26.6) | 24.3 (22.0, 26.7) | 0.001 | | 24.4 (22.2, 26.6) | 24.3 (22.1, 26.7) | | <0.001 |
| **Comorbidities, n (%)** |  |  |  | |  |  | |  |
| Hypertension | 1818 (45.4) | 1879 (46.9) | 0.03 | | 1821.3 (45.1) | 1832.3 (46.2) | | 0.02 |
| Diabetes mellitus | 104 (26.2) | 964 (24.0) | 0.049 | | 1079.0 (26.7) | 951.6 (24.0) | | 0.064 |
| Coronary heart disease | 476 (11.9) | 492 (12.3) | 0.013 | | 453.0 (11.2) | 481.2 (12.1) | | 0.028 |
| Cerebrovascular disease | 273 (6.8) | 348 (8.7) | 0.07 | | 280.6 (7.0) | 338.1 (8.5) | | 0.059 |
| Arrhythmia | 429 (10.7) | 465 (11.6) | 0.029 | | 414.3 (10.3) | 461.2 (11.6) | | 0.043 |
| Myocardial infarction | 48 (1.2) | 48 (1.2) | <0.001 | | 52.0 (1.3) | 47.3 (1.2) | | 0.009 |
| Peripheral artery disease | 96 (2.4) | 82 (2.0) | 0.024 | | 91.7 (2.3) | 74.6 (1.9) | | 0.028 |
| Cardiac interventions | 122 (3.0) | 147 (3.7) | 0.035 | | 123.0 (3.0) | 151.0 (3.8) | | 0.041 |
| COPD | 68 (1.7) | 95 (2.4) | 0.048 | | 70.7 (1.8) | 93.9 (2.4) | | 0.043 |
| **Preoperative medication (yes/no), n (%)** |  |  |  | |  |  | |  |
| ACEI | 143 (3.6) | 154 (3.8) | 0.015 | | 144.7 (3.6) | 148.9 (3.8) | | 0.009 |
| ARB | 432 (10.8) | 428 (10.7) | 0.003 | | 453.5 (11.2) | 417.5 (10.5) | | 0.023 |
| β-blockers | 306 (7.6) | 381 (9.5) | 0.067 | | 312.1 (7.7) | 359.0 (9.0) | | 0.047 |
| CCBs | 1075 (26.8) | 1049 (26.2) | 0.015 | | 1064.5 (26.4) | 1042.5 (26.3) | | 0.003 |
| Antiplatelets | 339 (8.5) | 355 (8.9) | 0.014 | | 341.3 (8.5) | 351.4 (8.9) | | 0.014 |
| Diuretics | 182 (4.5) | 243 (6.1) | 0.068 | | 186.3 (4.6) | 223.0 (5.6) | | 0.045 |
| Statin | 249 (6.2) | 266 (6.6) | 0.017 | | 253.4 (6.3) | 258.2 (6.5) | | 0.009 |
| Anticoagulants | 297 (7.4) | 355 (8.9) | 0.053 | | 287.6 (7.1) | 332.4 (8.4) | | 0.047 |
| Fibrates | 40 (1.0) | 53 (1.3) | 0.03 | | 39.9 (1.0) | 39.1 (1.0) | | <0.001 |
| **Preoperative laboratory data** |  |  |  | |  |  | |  |
| HGB (g/L), (median, IQR) | 131 (122, 141) | 131 (121, 141) | 0.008 | | 131 (122, 140) | 131 (121, 141) | | 0.001 |
| RBC (109/L), (median, IQR) | 4.30 (3.99, 4.60) | 4.31 (3.95, 4.65) | 0.005 | | 4.30 (3.98, 4.60) | 4.31 (3.95, 4.65) | | 0.004 |
| WBC (109/L), (median, IQR) | 5.77 (4.82, 6.94) | 5.94 (4.87, 7.22) | 0.063 | | 5.78 (4.83, 6.94) | 5.95 (4.88, 7.23) | | 0.063 |
| SCr (umol/L), (median, IQR) | 70.95 (60.90, 82.50) | 71.00 (60.70, 83.57) | <0.001 | | 71.40 (61.20, 83.00) | 71.20 (60.80, 83.60) | | 0.016 |
| PLT (109/L), (median, IQR) | 206 (172, 248) | 206 (166, 251) | 0.021 | | 207(172, 247) | 207 (167, 252) | | 0.003 |
| MCV (fl), (median, IQR) | 90.40 (87.90, 93.10) | 90.40 (87.60, 93.20) | 0.018 | | 90.40 (87.90, 93.00) | 90.30 (87.50, 93.20) | | 0.002 |
| Albumin (g/L), (median, IQR) | 40.10 (37.90, 42.30) | 40.10 (37.90, 42.70) | 0.016 | | 40.10 (37.90, 42.30) | 40.10 (37.80, 42.70) | | 0.006 |
| SII (109/L), (median, IQR) | 398 (278, 574) | 401 (275, 606) | 0.012 | | 398 (278, 577) | 407 (278, 614) | | 0.002 |
| **Surgery-related factors** |  |  |  | |  |  | |  |
| Surgery duration (min), (median, IQR) | 145 (94, 205) | 140 (90, 206) | 0.014 | | 145 (95, 207) | 142 (90, 210) | | <0.001 |
| ASA grade, n (%) |  |  | 0.011 | |  |  | | 0.005 |
| I | 42 (1.0) | 42 (1.0) |  | | 41.1 (1.0) | 39.8 (1.0) | |  |
| II | 3223 (80.3) | 3222 (80.3) |  | | 3229.6 (80.1) | 3184.7 (80.2) | |  |
| III | 727 (18.1) | 727 (18.1) |  | | 746.6 (18.5) | 728.7 (18.4) | |  |
| IV | 16 (0.4) | 19 (0.5) |  | | 17.2 (0.4) | 16.1 (0.4) | |  |
| Emergency surgery, n (%) | 89 (2.2) | 82 (2.0) | 0.012 | | 84.7 (2.1) | 77.1 (1.9) | | 0.011 |
| Colloid input (ml), (median, IQR) | 500 (0, 500) | 500 (0, 500) | 0.006 | | 500 (0, 500) | 500 (0, 500) | | 0.001 |
| Crystalloid input (ml), (median, IQR) | 1600(1100, 2100) | 1600 (1100, 2100) | 0.015 | | 1600 (1100, 2100) | 1600 (1100, 2100) | | 0.001 |
| Urine output (ml), (median, IQR) | 250(100, 600) | 200(100, 500) | 0.042 | | 250 (100, 600) | 250 (100, 500) | | 0.032 |
| Blood loss (ml), (median, IQR) | 100 (30, 200) | 100 (30, 200) | 0.014 | | 100 (30, 200) | 100(30, 200) | | 0.003 |
| Blood transfusion, n (%) | 336 (8.4) | 339 (8.5) | 0.003 | | 340.5 (8.4) | 336.0 (8.5) | | 0.001 |
| Intraoperative hypotension, n (%) | 938 (23.4) | 922 (23.0) | 0.009 | | 935.7 (23.2) | 911.4 (23.0) | | 0.005 |
| Surgical types, n (%) |  |  | 0.038 | |  |  | | 0.006 |
| General | 685 (17.1) | 693 (17.3) |  | | 704.0 (17.4) | 694.3 (17.5) | |  |
| Urology | 419 (10.4) | 399 (10.0) |  | | 411.3 (10.2) | 404.7 (10.2) | |  |
| Vascular | 130 (3.2) | 123 (3.1) |  | | 120.9 (3.0) | 119.6 (3.0) | |  |
| Thoracic | 346 (8.6) | 338 (8.4) |  | | 345.4 (8.6) | 339.0 (8.5) | |  |
| Neurosurgery | 207 (5.2) | 197 (4.9) |  | | 203.0 (5.0) | 199.7 (5.0) | |  |
| Orthopedics | 805 (20.1) | 826 (20.6) |  | | 795.8 (19.7) | 790.3 (19.9) | |  |
| Hepatobiliary | 832 (20.7) | 809 (20.2) |  | | 840.8 (20.8) | 820.2 (20.7) | |  |
| Others | 586 (14.6) | 625 (15.6) |  | | 613.3 (15.2) | 601.5 (15.2) | |  |

PS: Propensity Score; BMI: Body Mass Index; COPD: Chronic Obstructive Pulmonary Disease; ACEI: Angiotensin Converting Enzyme Inhibitors; ARB: Angiotensin Receptor Blocker; CCBs: Calcium Channel Blockers; HGB: Hemoglobin; RBC: Red Blood Cell; SCr: Serum Creatine; PLT: Platelet; RDW: Red Blood Cell Distribution Count; SII: Systemic immune-inflammation index; ASA: American Society of Anesthesiologists; IQR: interquartile range.
